# Supplementary material for: Discovery of novel candidates for anti-liposarcoma therapies by medium-scale high-throughput drug screening
Source: PubMed Central journal article supplement (PMC7946228; doi:10.1371/journal.pone.0248140), 2021-03-10
Supplement: pone.0248140.s007.pdf [file pone.0248140.s007.pdf]

|                |                  |           |            |
|----------------|------------------|-----------|------------|
| GSK21264!YM155 | JNJ-26481!APO866 | MLN2238   | triptolide |
| AKT1           | BIRC5            | HDAC1     | ACMSD      |
| AKT2           | SLC35F2          | HDAC10    | AFMID      |
| AKT3           | ABCB1            | HDAC11    | ANKRD62P   |
| BTK            |                  | HDAC11-AS | BST1       |
| GRB10          |                  | HDAC2     | CD38       |
| HSPB1          |                  | HDAC3     | DIDO1      |
| ILK            |                  | HDAC4     | IDO1       |
| MTCP1          |                  | HDAC5     | IDO2       |
| PDK2           |                  | HDAC6     | KYNU       |
| PIK3CA         |                  | HDAC7     | NADSYN1    |
| PIK3CG         |                  | HDAC8     | NAMPT      |
| PIK3R1         |                  | HDAC9     | NAPRT      |
| PIK3R2         |                  |           | NMNAT1     |
| PAK1           |                  |           | PARP1      |
| PRKCA          |                  |           | PARP10     |
| PRKCB          |                  |           | PARP11     |
| PRKCZ          |                  |           | PARP12     |
| PTEN           |                  |           | PARP14     |
| TCL1A          |                  |           | PARP15     |
| EIF4B          |                  |           | PARP16     |
| EIF4E          |                  |           | PARP2      |
| EIF4EBP1       |                  |           | PARP3      |
| EIF4G1         |                  |           | PARP4      |
| FKBP1A         |                  |           | PARP6      |
| MTOR           |                  |           | PARP8      |
| PDK1           |                  |           | PARP9      |
| PDK2           |                  |           | PARPBP     |
| PTEN           |                  |           | QPRT       |
| RHEB           |                  |           | RPARP-AS1  |
| RPS6KB1        |                  |           | SIRT1      |
| TSC1           |                  |           | SIRT2      |
| TSC2           |                  |           | SIRT3      |
| CASP9          |                  |           | SIRT4      |
| CHUK           |                  |           | SIRT5      |
| FOXO1          |                  |           | SIRT6      |
| NFKBIA         |                  |           | SIRT7      |
|                |                  |           | TDO2       |
|                |                  |           | TIPARP     |
|                |                  |           | TIPARP-AS1 |
|                |                  |           | TNKS       |
|                |                  |           | TNKS1BP1   |
|                |                  |           | TNKS2      |
|                |                  |           | TNKS2-AS1  |
|                |                  |           | PSMD6      |
|                |                  |           | PSMD6-AS2  |
|                |                  |           | PSMD7      |
|                |                  |           | PSMD8      |
|                |                  |           | PSMD9      |
|                |                  |           | PSME1      |
|                |                  |           | PSME2      |
|                |                  |           | PSME3      |
|                |                  |           | PSME4      |
|                |                  |           | PSMF1      |
|                |                  |           | PSMG1      |
|                |                  |           | PSMG2      |
|                |                  |           | PSMG3      |
|                |                  |           | PSMG3-AS1  |
|                |                  |           | PSMG4      |
|                |                  |           | RNF139     |
|                |                  |           | RNF139-AS1 |
|                |                  |           | RNF5       |
|                |                  |           | RNF5P1     |
|                |                  |           | SEC62      |
|                |                  |           | SEL1L      |
|                |                  |           | SEL1L2     |
|                |                  |           | SEL1L3     |
|                |                  |           | UBE2G2     |
|                |                  |           | UBE2J2     |
|                |                  |           | UBXN4      |
|                |                  |           | UFD1L      |
|                |                  |           | USP14      |
|                |                  |           | VCP        |
|                |                  |           | VCPIP1     |
|                |                  |           | VCPKMT     |
